# Supplementary material
Source: PubMed Central journal article supplement (PMC8207905)
Supplement: JGMED20009481.pdf [file JGMED20009481.pdf]

**Supplementary Data**

Study Instrument Clinical Vignettes

|                                                                                                                                                                                                                                                                                                                                                                                                                                                           |
|-----------------------------------------------------------------------------------------------------------------------------------------------------------------------------------------------------------------------------------------------------------------------------------------------------------------------------------------------------------------------------------------------------------------------------------------------------------|
| <p>A 50 year old man who has no other cardiac risk factors except elevated cholesterol comes back for follow-up. After six months on a low cholesterol diet, his total cholesterol is 240 and his LDL is 150. His HDL cholesterol is 50. Would you recommend oral agents?</p>                                                                                                                                                                             |
| <p>A 60 year old man with symptoms of benign prostatic hyperplasia comes in for an evaluation. He is moderately symptomatic and has no evidence of renal compromise or cancer. The patient is somewhat bothered by these symptoms. Would you recommend a urology referral?</p>                                                                                                                                                                            |
| <p>A 50 year old man with a one month history of exertional chest pain comes in to see you for the results of his stress test. He is on no medications. After 6 minutes of exercise, he developed 2 millimeters of ST depression in leads II, III, and aVF. Would you recommend a cardiology referral?</p>                                                                                                                                                |
| <p>A 35-year-old man developed low back pain after shoveling snow three weeks ago. He presents to the office for an evaluation. On examination there is a new left foot drop. Would you recommend an MRI?</p>                                                                                                                                                                                                                                             |
| <p>An asymptomatic 60 year old white man who has no family history of prostate cancer and a normal digital rectal exam asks you about a PSA screen. Would you recommend a PSA test?</p>                                                                                                                                                                                                                                                                   |
| <p>A 40 year old monogamous, married woman calls to report a two-day history of vaginal itching and thick white discharge. She has no abdominal pain or fever. Would you recommend an office visit?</p>                                                                                                                                                                                                                                                   |
| <p>A 50 year old woman with a history of uterine fibroids comes to a routine office visit. She feels well and has no complaints except for heavy menses. Her vital signs and physical examination are unremarkable except for a 2/6 systolic, mid peaking murmur best heard at the left sternal heart border. This is the first time that you have detected a murmur on examination since you met her 3 years ago. Would you order an echocardiogram?</p> |
| <p>An echocardiogram obtained two years ago on a 64 year old man with previously intermittent pedal edema showed mild aortic stenosis. He is now asymptomatic except for stable pedal edema. Would you repeat an echocardiogram now?</p>                                                                                                                                                                                                                  |
| <p>A 56 year old woman complains of generalized fatigue and malaise over the past month. She has been sleeping well and does not awake at night. She does not snore. But, when she wakes up, she does not feel refreshed and feels like "I could stay in bed all day." She denies any other symptoms. Her physical examination is normal including her affect. Would you order an ANA?</p>                                                                |
| <p>A 48 year old woman with no significant past medical history is brought to the ED with syncope. She denies any chest pain or palpitations but was unresponsive for 15 seconds without any seizure-like activity. Her physical examination, including a thorough neurological examination, is negative. An ECG was normal. Would you order a head CT?</p>                                                                                               |
| <p>A 42 year old man presents to you for a pre-operative physical examination. He is about to</p>                                                                                                                                                                                                                                                                                                                                                         |

Etherington NB, Clancy C, Jones RB, Dine CJ, Diemer G. Peer discussion decreases practice intensity and increases certainty in clinical decision-making among internal medicine residents. *J Grad Med Educ.* 2021;13(3):371–376. <http://dx.doi.org/10.4300/JGME-D-20-00948.1>

|                                                                                                                                                                                                                                                                                                                                                                                     |
|-------------------------------------------------------------------------------------------------------------------------------------------------------------------------------------------------------------------------------------------------------------------------------------------------------------------------------------------------------------------------------------|
| have an inguinal hernia repair. He is otherwise asymptomatic and has a normal examination except for the inguinal hernia. Would you order coagulation studies prior to surgery?                                                                                                                                                                                                     |
| A 60 year old woman with a history of hypertension comes in for a routine examination. She is a lifetime nonsmoker, exercises regularly at the gym on the elliptical machine and tries to maintain a healthy diet. Her BMI is normal. Would you order a dexa scan?                                                                                                                  |
| A 52 year old woman is admitted with severe gastroenteritis after presenting to the ED with lightheadedness. She has already received 1L of normal saline in the ED and is starting to feel better but continues to have vomiting and diarrhea. She is admitted for further hydration. Would you order subcutaneous heparin for DVT prophylaxis?                                    |
| A 68 year old man is admitted after an endoscopy for an episode of chest pain in the recovery unit. He has no history of heart disease and is quite active without chest pain in the past. Would you order a CBC?                                                                                                                                                                   |
| A 45 year old woman with seasonal allergies presents to your office with 5 days of sinus congestion, frontal headaches, rhinorrhea, a cough productive of yellow sputum and a temperature of 101. Would you prescribe antibiotics?                                                                                                                                                  |
| An 18 year old woman presents for a routine examination. She has no complaints and is not sexually active. She has not received the gardasil vaccine. Would you recommend a pap smear?                                                                                                                                                                                              |
| A 67 year old woman presents for a routine examination. She is in a monogamous relationship with her husband of 30 years. She has never had an abnormal pap smear. Her last pap smear was 3 years ago. Would you recommend a pap smear?                                                                                                                                             |
| A 72 year old woman presents for a pre-operative evaluation prior to an elective hip replacement. She is otherwise asymptomatic and has a normal cardiopulmonary examination. Would you order a chest X-ray prior to her surgery?                                                                                                                                                   |
| A 48 year old man presents with frequent headaches. They are periorbital in nature and can last several hours, during which he is unable to work secondary to the pain. They have been going on for several years but seem to be more frequent now. He denies any fevers. His examination, including a thorough neurological examination, is normal. Would you order brain imaging? |
| A 36 year old woman was found to have a simple right ovarian cyst on ultrasound three years ago. She is currently asymptomatic. Would you repeat a pelvic ultrasound?                                                                                                                                                                                                               |
| A 55 year old man with a history of type II diabetes is about to begin an exercise program with a personal trainer. He has no history of cardiac disease but is obese (BMI of 32). Would you order an ECG before advising him to exercise?                                                                                                                                          |
| A 64 year old man is about to have an elective knee replacement. He has no history of diabetes or cardiac disease. He states he can walk at most 1 block before he stops because of knee pain and dyspnea. Would you order a stress test prior to surgery?                                                                                                                          |
| A 22 year old woman with a history of well-controlled asthma presents for routine follow-up. She denies any asthma symptoms and has not used her rescue inhaler over the past year. Her                                                                                                                                                                                             |

Etherington NB, Clancy C, Jones RB, Dine CJ, Diemer G. Peer discussion decreases practice intensity and increases certainty in clinical decision-making among internal medicine residents. *J Grad Med Educ.* 2021;13(3):371–376. <http://dx.doi.org/10.4300/JGME-D-20-00948.1>

|                                                                                                                                                                                                                                                                                                                                                                                        |
|----------------------------------------------------------------------------------------------------------------------------------------------------------------------------------------------------------------------------------------------------------------------------------------------------------------------------------------------------------------------------------------|
| <p>last spirometry was two years ago when she had symptoms and showed mild obstruction. Would you repeat spirometry?</p>                                                                                                                                                                                                                                                               |
| <p>A 50 year old woman has intermittent heartburn that has not responded to dietary changes. She denies any dysphagia or regurgitation. She uses Tums about once a week. Would you prescribe a proton pump inhibitor?</p>                                                                                                                                                              |
| <p>A 65 year old man was hospitalized for a COPD exacerbation. He improved with high doses of Prednisone and was given 40 mg daily for 5 days as well as a course of doxycycline. He is now being discharged and feeling back to baseline with no wheezing on examination. Would you continue an outpatient steroid taper?</p>                                                         |
| <p>A 32 year old man comes to see you in the office. He has had symptoms of fevers and myalgias for the past 2 days. You sent off a nasal swab for influenza. Would you start oseltamivir (Tamiflu) while waiting for the results which should come back tomorrow?</p>                                                                                                                 |
| <p>A 64 year old woman with a history of COPD presents to your outpatient clinic with several days of shortness of breath and wheezing typical for her usual COPD exacerbations. She is in no distress, but she has end-expiratory wheezing throughout. You prescribe a Prednisone taper. Would you prescribe a course of antibiotics?</p>                                             |
| <p>A 68 year old man with a history of hypertension and hypercholesterolemia was admitted for a NSTEMI after presenting to the ED with chest pain. He is now chest pain free. Do you think he should be evaluated for a cardiac catheterization during this hospital stay?</p>                                                                                                         |
| <p>A 64 year old woman is admitted for chest pain. Her cardiac enzymes and ECGs are negative. She was found, however, to have a microcytic anemia with a hemoglobin of 10 g/dL on her admission labs and denies any symptoms suggestive of a GI bleed. Old studies are not available. Would you send iron studies before she is discharged?</p>                                        |
| <p>A 58 year old woman who is on Prednisone 10 mg daily chronically for her rheumatoid arthritis is admitted for open heart surgery (aortic valve replacement). Would you recommend giving her stress dose steroids peri-operatively?</p>                                                                                                                                              |
| <p>A 42 year old woman is admitted for pleuritic chest pain thought to be from pleuritis. She has complaints of significant new joint aches (especially in her hands) and generalized fatigue. You suspect a new diagnosis of lupus and send the appropriate labs for diagnosis. Her symptoms are now well controlled. Would you call a rheumatology consult before her discharge?</p> |
| <p>A 34 year old woman with a history of asthma is admitted with wheezing and shortness of breath in the setting of an upper respiratory infection. She received nebulizers and steroids in the emergency department. She feels much better but not yet back to baseline. Would you continue nebulizer treatments during her hospital stay?</p>                                        |
| <p>A 54 year old woman with a history of hypertension comes into the ED with an episode of</p>                                                                                                                                                                                                                                                                                         |

Etherington NB, Clancy C, Jones RB, Dine CJ, Diemer G. Peer discussion decreases practice intensity and increases certainty in clinical decision-making among internal medicine residents. *J Grad Med Educ.* 2021;13(3):371–376. <http://dx.doi.org/10.4300/JGME-D-20-00948.1>

substernal chest pain that lasted 3 hours that morning and then resolved spontaneously. She has never had chest pain before. Her cardiac enzymes and ECG (obtained 3 hours after her pain stopped) are normal. Would you admit her to rule out an MI?

A 45 year old woman is admitted for cellulitis. On admission labs, she was found to have an elevated creatinine of 1.6 mg/dL (before starting antibiotics). She has received 1 L of normal saline in the emergency department. Would you send urine electrolytes at this time?
